# Supplementary material
Source: Royal Society of Chemistry journal article supplement (https://www.rsc.org/suppdata/dt/1999/1541/902791b.doc)
Supplement: Supplementary file 1 [file 902791b.doc]

**Compounds Containing 3,2-Sb=C bonds: Synthesis and Structural Characterisation of the First Stiba-enol, Mes*C(O)Sb=C(OH)Mes*, Mes* = C6H2But3-2,4,6, and a 2,3-Distibabutadiene, {Mes(Me3SiO)C=Sb-}2, Mes = C6H2Me3-2,4,6**

**Cameron Jones*, Jonathan W. Steed and Ryan C. Thomas**

**Supplementary Synthetic and Spectroscopic Information for**

**Compounds 2, 3, 4, and 5**

**Synthesis of {Mes(Me3SiO)C=Sb-}2 2.** A solution of 2,4,6-trimethylbenzoyl chloride (0.6g, 3.3 mmol) in dme (20 cm3) was added over 20 min to a solution of [Li{Sb(SiMe3)2}(dme)] (1.22g, 3.3 mmol) in dme (20 cm3) at -78oC. The resulting green solution was warmed to ambient temperature and stirred overnight in the absence of light. Volatiles were removed under vacuum and the brown residue was extracted with hexane (2 x 20 cm3) and filtered. The filtrate was concentrated under vacuum to 5 cm3 and cooled to -30oC to yield compound **2** as red plates (0.11g, 5% yield), m.p. 105oC (decomp.). 1H NMR (400 MHz, C6D6, 298K),  0.34 (18H, s, OSi(CH3)3), 2.22 (6H, s, p-PhCH3), 2.45 (12H, s, o-PhCH3) and 6.87 (4H, s, aryl H). IR (Nujol) /cm-1 1704 (m), 1634 (m) and 1609 (m).

**Synthesis of [Li{OC(Mes*)SbC(Mes*)O}(DME)] 3.** A solution of 2,4,6-tri-*tert*-butylbenzoyl chloride (1.02g, 3.3 mmol) in dme (15 cm3) was added over 20 min to a solution of [Li{Sb(SiMe3)2}(dme)] (1.22g, 3.3 mmol) in dme (25 cm3) at -50oC. The resulting pink solution was warmed to ambient temperature and stirred overnight in the absence of light. Volatiles were removed under vacuum and the dark purple residue washed with hexane (2 x 20 cm3) to leave a red powder which was recrystallised from dme (5 cm3) at -30oC to afford compound **3** as red plates (0.46g, 38% yield), m.p. 170oC(decomp.). 1H NMR (400 MHz, C6D6, 298K),  1.26 (18H, s, p-But), 1.73 (36H, s, o-But), 3.04 (4H,s, OCH2), 3.15 (6H, s, OCH3) and 7.49 (4H, s, aryl H). 13C NMR (100.6 MHz, C6D6, 298K),  31.2, 34.5 (CCH3), 35.0, 38.3 (CCH3), 58.9 (OCH3), 70.5 (OCH2), 123.1 (aryl CH), 142.6, 147.7, 147.8 (quaternary aryl) and 206.6 (SbC). IR (Nujol) /cm-1 1538 (m) and 1599 (w).

**Synthesis of [Li{OC(Mes)SbC(Mes)O}(DME)0.5] 4.** A solution of 2,4,6-trimethylbenzoyl chloride (0.6g, 3.3 mmol) in dme (20 cm3) was added over 20 min to a solution of [Li{Sb(SiMe3)2}(dme)] (1.22g, 3.3 mmol) in dme (20 cm3) at -78oC. The resulting green solution was warmed to ambient temperature and stirred overnight in the absence of light. Volatiles were removed under vacuum and the brown residue washed with hexane (2 x 20 cm3) to leave a red powder which was recrystallised from dme (5 cm3) at -30oC to yield compound **4** as red blocks (0.23g, 45% yield), m.p. 103-105oC (decomp.). 1H NMR (400 MHz, C6D6, 298K),  2.31 (6H, s, p-PhCH3), 2.77 (12H, s, o-PhCH3), 3.02 (2H, s, OCH2), 3.08 (3H, s, OCH3), 6.90 (4H, s, aryl H). 13C NMR (100.6 MHz, C6D6, 298K),  20.9, 21.4 (CCH3), 59.0 (OCH2), 70.8 (OCH3), 129.6 (aryl CH), 137.3, 131.6, 150.3 (quaternary aryl) and 210.4 (SbC). IR (Nujol) /cm-1 1569 (m), 1604 (m) and 1664 (s).

**Synthesis of Mes*C(O)Sb=C(OH)Mes*** **5**. A 1 mol dm-3 solution of anhydrous HCl (0.5mmol) in diethyl ether (5cm3) was added over 10 min to a solution of compound **3** (0.42g, 0.55mmol) in diethyl ether (15cm3) at -78oC. The resulting red solution was warmed to 0oC, volatiles removed under vacuum and the red residue recrystallised from diethyl ether (5ml) at -30oC to yield **5** as red plates (0.35g, 97% yield), m.p. 100-103oC (dec.). 1H NMR (400 MHz, C6D6, 298K),  1.34 (18H, s, p-But), 1.64 (36H, s, o-But), 7.58 (4H, s, aryl H) and 18.48 (1H, s, OHO); 13C NMR (100.6 MHz, C6D6, 298K),  40.9, 42.1 (CCH3), 44.3, 47.4 (CCH3), 133.0 (aryl CH), 154.0, 157.4, 159,7 (quaternary aryl) and 211.8 (SbC). IR (Nujol) /cm-1 1599 (m), 1694 (s) and 1670 (m). FAB mass spectrum, *m/z* 273 (CMes*O, 100%).
